# Supplementary material for: Hexameric assembly of 5,17-di-substituted calix[4]arene in the solid state
Source: Royal Society of Chemistry journal article supplement (doi:10.1039/c7ce01515a), 2017-01-01
Supplement: c7ce01515a1.pdf [file c7ce01515a1.pdf]

## **Supplementary Information**

### **Hexameric assembly of 5,17-di-substituted calix[4]arene in the solid state**

Yutaro Yamasaki, Ryo Sekiya, and Takeharu Haino\*

<sup>1</sup> Department of Chemistry, Graduate School of Science, Hiroshima University, 1-3-1 Kagamiyama,  
Higashi-Hiroshima, Hiroshima 739-8526, Japan

To whom correspondence should be addressed

[haino@hiroshima-u.ac.jp](mailto:haino@hiroshima-u.ac.jp)

# Contents

## Supporting Figures and Tables

|                     |                                                                                                                                                                                     |        |
|---------------------|-------------------------------------------------------------------------------------------------------------------------------------------------------------------------------------|--------|
| • <b>Figure S1</b>  | $^1\text{H}$ and $^{13}\text{C}$ NMR spectra of ( <i>S,S</i> )- <b>1</b> in $\text{DMSO-}d_6$                                                                                       | ... S3 |
| • <b>Figure S2.</b> | X-ray crystal structure of ( <i>S,S</i> )- <b>1</b> ·( $\text{MeOH}$ )                                                                                                              | ... S3 |
| • <b>Figure S3.</b> | X-ray crystal structure of ( <i>S,S</i> )- <b>1</b> ·( $1\text{-PrOH}$ )                                                                                                            | ... S4 |
| • <b>Figure S4.</b> | X-ray crystal structure of ( <i>S,S</i> )- <b>1</b> ·( $\text{CH}_3\text{CN}$ )                                                                                                     | ... S4 |
| • <b>Figure S5.</b> | Head-to-tail columnar structures consisting of ( <i>R,R</i> )- <b>1</b> and ( <i>S,S</i> )- <b>1</b>                                                                                | ... S5 |
| • <b>Figure S6.</b> | $^1\text{H}$ NMR spectrum of ( <i>S,S</i> )- <b>1</b> <sub>apo</sub> in $\text{DMSO-}d_6$                                                                                           | ... S5 |
| • <b>Figure S7.</b> | $^1\text{H}$ NMR spectrum of ( <i>S,S</i> )- <b>1</b> <sub>apo</sub> after contacting benzene vapor with ( <i>S,S</i> )- <b>1</b> <sub>apo</sub> for 3 days                         | ... S5 |
| • <b>Figure S8.</b> | $^1\text{H}$ NMR spectrum of ( <i>S,S</i> )- <b>1</b> <sub>apo</sub> after contacting a mixed vapor of benzene and acetone with ( <i>S,S</i> )- <b>1</b> <sub>apo</sub> for 3 days  | ... S6 |
| • <b>Figure S9.</b> | $^1\text{H}$ NMR spectrum of ( <i>S,S</i> )- <b>1</b> <sub>apo</sub> after contacting a mixed vapor of benzene and methanol with ( <i>S,S</i> )- <b>1</b> <sub>apo</sub> for 3 days | ... S6 |

## Supporting Figures

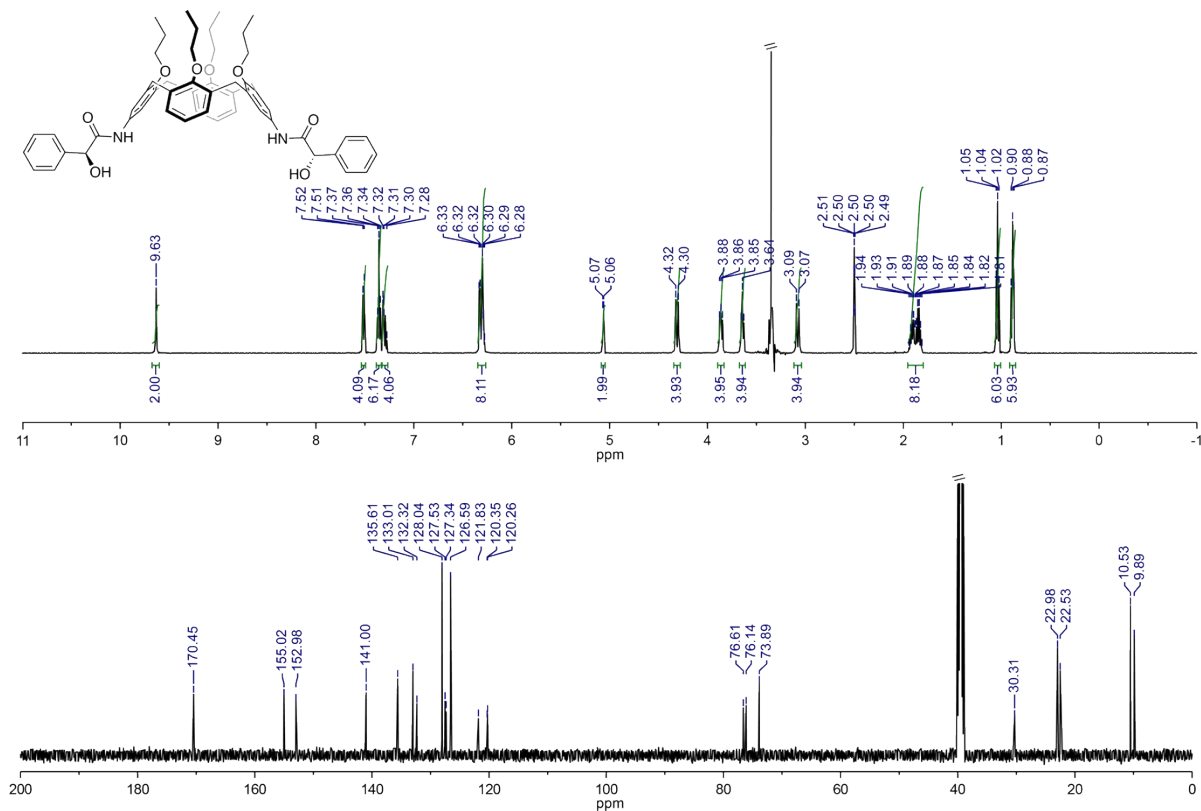

**Figure S1.** <sup>1</sup>H (500 MHz, DMSO-*d*<sub>6</sub>, 293 K) and <sup>13</sup>C (125 MHz, DMSO-*d*<sub>6</sub>, 293 K) NMR spectra of (S,S)-1.

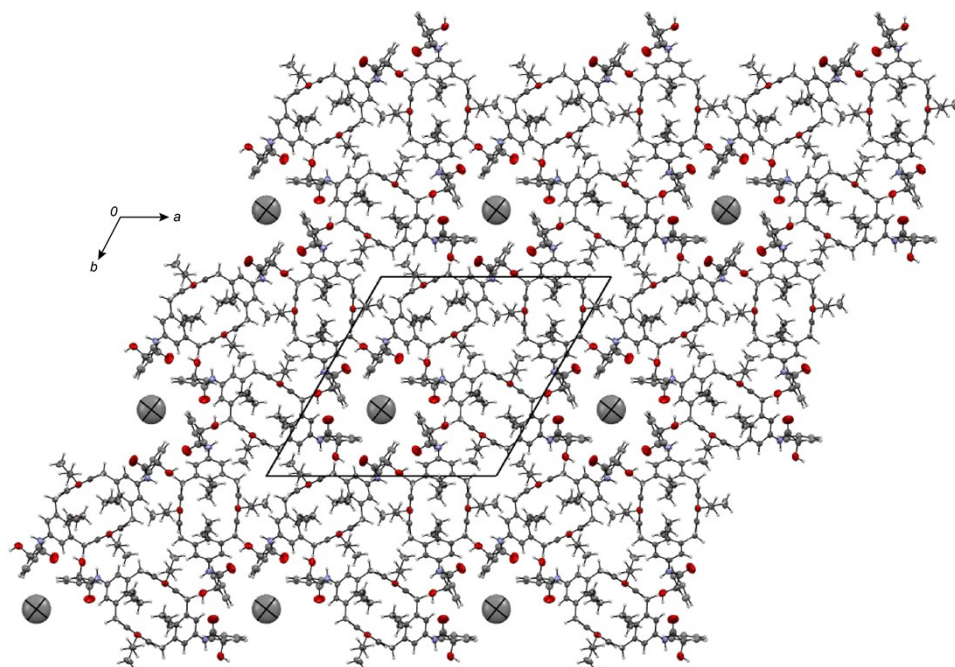

**Figure S2.** X-ray crystal structure of (S,S)-1·(MeOH) viewed down along the crystallographic *c* axis. Color scheme: gray (carbon), white (hydrogen), blue (nitrogen), red (oxygen).

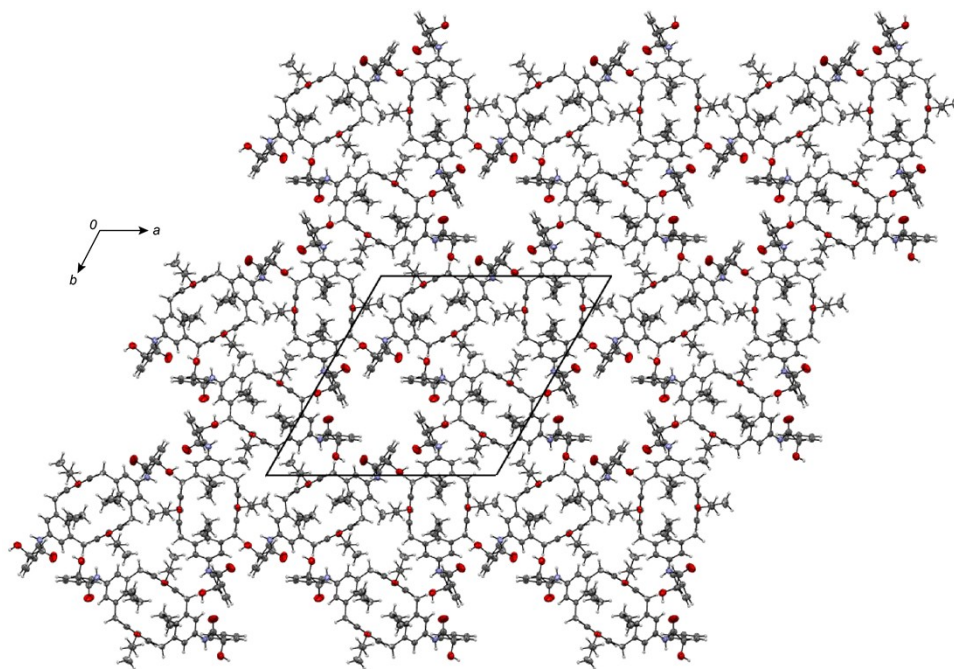

**Figure S3.** X-ray crystal structure of (*S,S*)-1-(1-PrOH) viewed down along the crystallographic *c* axis. Color scheme: gray (carbon), white (hydrogen), blue (nitrogen), red (oxygen).

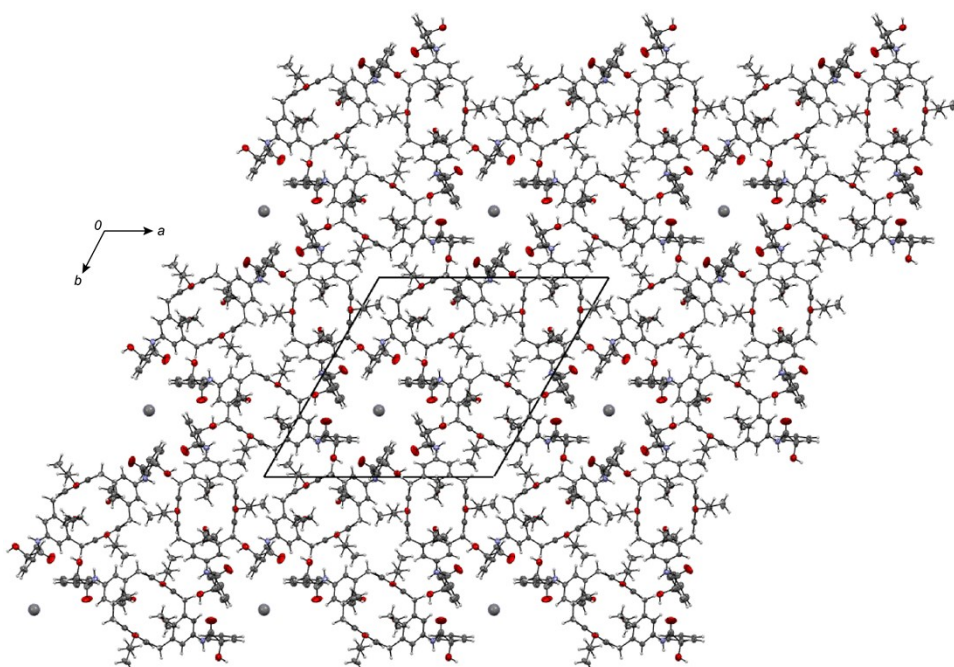

**Figure S4.** X-ray crystal structure of (*S,S*)-1-(CH<sub>3</sub>CN) viewed down along the crystallographic *c* axis. Color scheme: gray (carbon), white (hydrogen), blue (nitrogen), red (oxygen).

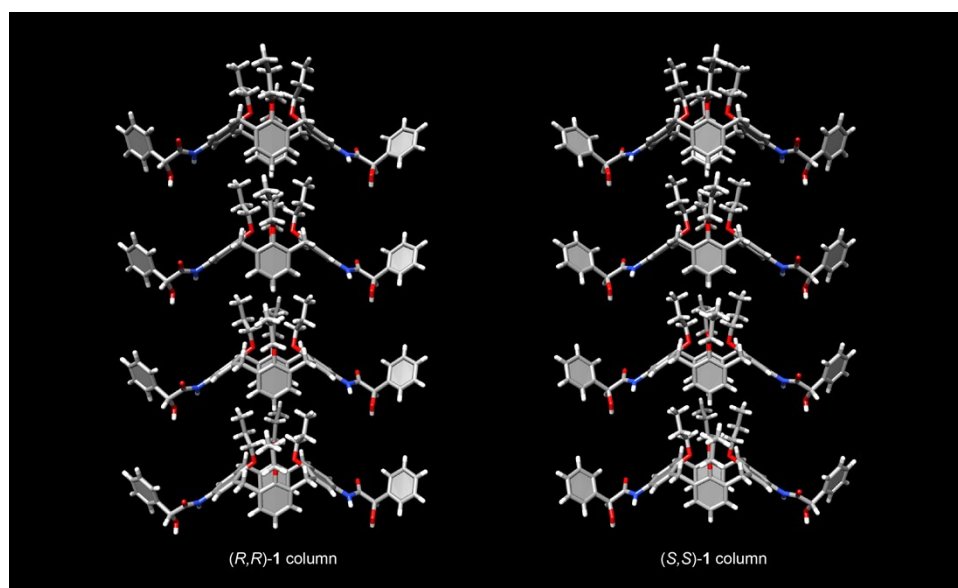

**Figure S5.** Head-to-tail columnar structures consisting of (*R,R*)-**1** (left) and (*S,S*)-**1** (right) found in *rac*-**1**. Color scheme: gray (carbon), white (hydrogen), blue (nitrogen), red (oxygen).

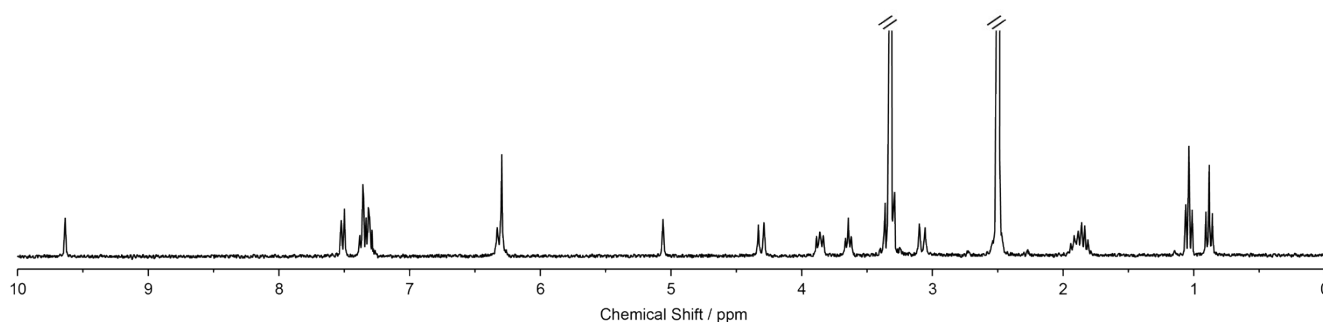

**Figure S6.**  $^1\text{H}$  NMR spectrum (300 MHz,  $\text{DMSO-}d_6$ , 293 K) of (*S,S*)-**1**<sub>apo</sub>.

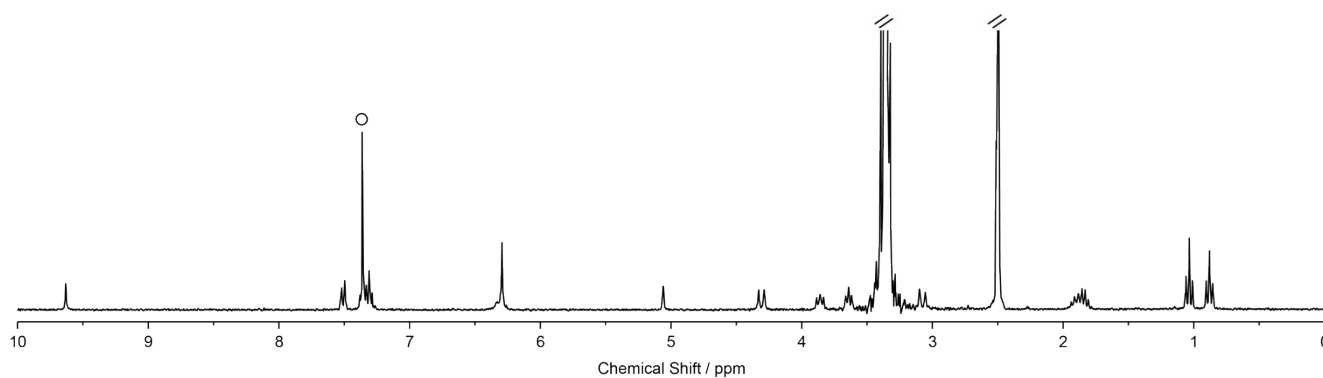

**Figure S7.**  $^1\text{H}$  NMR spectrum (300 MHz,  $\text{DMSO-}d_6$ , 293 K) of (*S,S*)-**1**<sub>apo</sub> after contacting benzene vapor with (*S,S*)-**1**<sub>apo</sub> for 3 days at room temperature. Open circle denotes the signal of benzene.

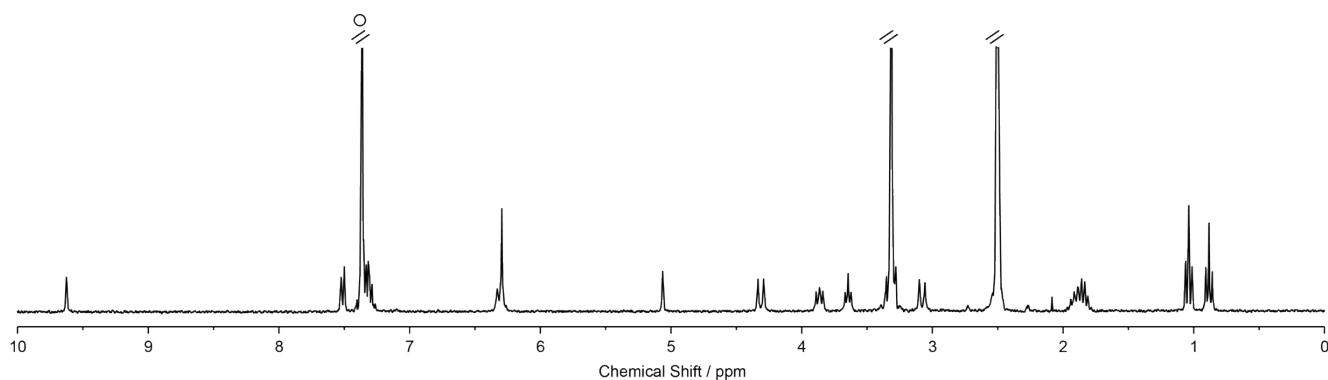

**Figure S8.**  $^1\text{H}$  NMR spectrum (300 MHz,  $\text{DMSO-}d_6$ , 293 K) of  $(S,S)\text{-1}_{\text{apo}}$  after contacting a mixed vapor of benzene and acetone with  $(S,S)\text{-1}_{\text{apo}}$  for 3 days at room temperature. Open circle denotes the signal of benzene.

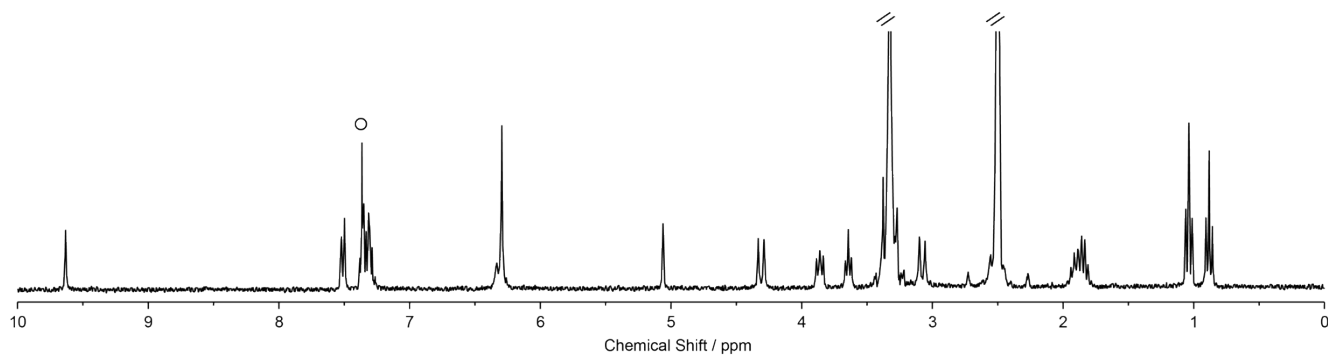

**Figure S9.**  $^1\text{H}$  NMR spectrum (300 MHz,  $\text{DMSO-}d_6$ , 293 K) of  $(S,S)\text{-1}_{\text{apo}}$  after contacting a mixed vapor of benzene and ethyl acetate with  $(S,S)\text{-1}_{\text{apo}}$  for 3 days at room temperature. Open circle denotes the signal of benzene.
